## Comparing proportional and ordinal dominance ranks reveals multiple competitive landscapes in an animal society

Emily J Levy<sup>1\*</sup> and Matthew N Zippel<sup>1\*</sup>, Emily McLean<sup>2</sup>, Fernando A Campos<sup>1,3</sup>, Mauna Dasari<sup>4</sup>, Arielle S Fogel<sup>5,6</sup>, Mathias Franz<sup>7</sup>, Laurence R Gesquiere<sup>1</sup>, Jacob B Gordon<sup>1</sup>, Laura Grieneisen<sup>8</sup>, Bobby Habig<sup>4,9</sup>, David J Jansen<sup>4</sup>, Niki H Learn<sup>10</sup>, Chelsea J Weibel<sup>4</sup>, Jeanne Altmann<sup>10,11</sup>, Susan C Alberts<sup>1,5,11^</sup>, Elizabeth A Archie<sup>4,11^c</sup>

### Author affiliations:

<sup>1</sup>Department of Biology, Duke University, 130 Science Drive, Durham, NC 27708, USA;

<sup>2</sup>Division of Natural Sciences and Mathematics, Oxford College of Emory University, 801 Emory Street, Oxford, GA 30054, USA;

<sup>3</sup>Department of Anthropology, University of Texas at San Antonio, One UTSA Circle, San Antonio, TX 78249, USA;

<sup>4</sup>Department of Biological Sciences, University of Notre Dame, Notre Dame, IN 46556, USA;

<sup>5</sup>Department of Evolutionary Anthropology, Duke University, 130 Science Drive, Durham, NC 27708, USA;

<sup>6</sup>University Program in Genetics and Genomics, Duke University, 3 Genome Court, Durham, NC 27710, USA;

<sup>7</sup>Department of Wildlife Diseases, Leibniz Institute for Zoo and Wildlife Research, Alfred-Kowalke-Str. 17, 10315 Berlin, Germany;

<sup>8</sup>College of Biological Sciences, University of Minnesota, 420 Washington Ave SE, Minneapolis, MN 55455;

<sup>9</sup>Department of Biology, Queens College, City University of New York, 65-30 Kissena Blvd., Flushing, New York, NY 11367, USA;

<sup>10</sup>Department of Ecology and Evolutionary Biology, Princeton University, 106A Guyot Hall, Princeton, NJ 08544, USA;

<sup>11</sup>Institute of Primate Research, National Museums of Kenya, Nairobi 00502, Kenya

*\*First authors contributed equally*

*^Last authors contributed equally*

*^cCorresponding author*

1 **Abstract:** Across group-living animals, linear dominance hierarchies lead to disparities in access to  
2 resources, health outcomes, and reproductive performance. Studies of how dominance rank affects  
3 these outcomes typically employ one of several dominance rank metrics without examining the  
4 assumptions each metric makes about its underlying competitive processes. Here we compare the  
5 ability of two dominance rank metrics—ordinal rank and proportional or ‘standardized’ rank—to predict  
6 20 distinct traits in a well-studied wild baboon population in Amboseli, Kenya. We propose that ordinal  
7 rank best predicts outcomes when competition is density-dependent, while proportional rank best  
8 predicts outcomes when competition is density-independent. We found that for 75% (15/20) of the  
9 traits, one of the two rank metrics performed better than the other. Strikingly, all male traits were  
10 better predicted by ordinal than by proportional rank, while female traits were evenly split between  
11 being better predicted by proportional or ordinal rank. Hence, male and female traits are shaped by  
12 different competitive regimes: males’ competitive environments are largely driven by density-  
13 dependent resource access (e.g., access to estrus females), while females’ competitive environments are  
14 shaped by both density-independent resource access (e.g. distributed food resources) and density-  
15 dependent resource access. However, traits related to competition for social and mating partners are an  
16 exception to this sex-biased pattern: these traits were better predicted by ordinal rank than by  
17 proportional rank for both sexes. We argue that this method of comparing how different rank metrics  
18 predict traits of interest can be used as a way to distinguish between different competitive processes  
19 operating in animal societies.

20 **Key Words:** ordinal rank, relative rank, proportional rank, longitudinal studies, rank, social dominance,  
21 baboons

## 22 Introduction:

23 In group-living animals, individuals can often be linearly ranked according to their priority of  
24 access to resources, or their ability to win conflicts (e.g. insects [1–4]; crustaceans [5–7], fish [8–11],  
25 birds [12–17], and mammals [18–22]). The resulting dominance hierarchies are associated with a wide  
26 range of traits, including physiology [23–25], immunity and disease risk [26–29], behavior [30–32],  
27 reproductive success [30,33–38], longevity [30,39–41], and offspring survival [30,35,42,43]. The causes  
28 and consequences of dominance rank are therefore integral to our understanding of the evolution of  
29 animal behaviors and life history strategies.

30 When studying these causes and consequences, researchers can choose between several ways  
31 of measuring rank (e.g., ordinal rank, proportional rank, Elo score, David's score [44,45]). Researchers  
32 commonly assign each individual's rank as its order in the dominance hierarchy (i.e., 1, 2, 3, etc.); we  
33 refer to this measure as *ordinal rank*. Researchers may also normalize those ordinal ranks to the number  
34 of individuals in the hierarchy, producing ranks that represent the proportion of the individuals that  
35 each individual dominates (usually referred to as “relative” or “standardized” rank, e.g. [46–54]); we  
36 refer to this measure as *proportional rank* because this term describes more precisely the nature of the  
37 metric.

38 Often, researchers choose one of these dominance rank metrics without stating the  
39 assumptions that the metric makes about the nature of rank-based competition [46–49,51] (but see  
40 [52,55]). The choice of a given rank metric is important because studies sometimes find differences in  
41 the ability of different rank metrics to predict rank-related traits, even in the same population. For  
42 example, Archie et al. (2014) demonstrated that proportional rank, but not ordinal rank, predicted risk  
43 of injury in female baboons in the Amboseli ecosystem in Kenya [56]. In the same population,  
44 proportional rank was also a better predictor of females' fecal glucocorticoid concentrations than  
45 ordinal rank (Levy et al., in revision). These studies highlight the need to understand the contexts in  
46 which one rank metric predicts a trait better than another.

47 Here, we examine the ability of ordinal and proportional rank metrics to predict 20 sex- and age-  
48 class-specific traits in the Amboseli baboon population (Table 1). We had two goals. First, we explicitly  
49 identify the assumptions each metric makes about the underlying competitive landscapes that shape  
50 rank-related traits. We identify theoretical scenarios in which we expect either ordinal or proportional  
51 rank to be a better measure of competitive interactions and, therefore, a better predictor of rank-  
52 related traits. Second, we identify which rank metric (ordinal or proportional) best predicts a wide range  
53 of rank-related traits in wild baboons, with the aim of identifying broad patterns of the role of  
54 competition in this population.

55

### 56 *Assumptions of ordinal and proportional rank metrics*

57 As described above, an individual's ordinal rank reflects the *order* in which an individual appears  
58 in a linear dominance hierarchy (i.e., ranks 1, 2, 3...n; Figure 1) [17,57,58]. In contrast, proportional rank  
59 accounts for the number of individuals being ranked (i.e., it accounts for hierarchy size) by measuring  
60 the *proportion* of other individuals in a hierarchy that an individual outranks (Figure 1) [46–54]. For  
61 example, an individual with proportional rank 0.75 outranks 75% of other individuals in its hierarchy.  
62 When the number of individuals in the hierarchy does not vary in a given dataset, ordinal and  
63 proportional rank are perfectly correlated. However, if the study contains multiple social groups with  
64 different hierarchy sizes, or if hierarchy size varies over time, then ordinal and proportional ranks are no  
65 longer interchangeable (see Supplementary Materials, Table S1, Figure S2, and Figure S3).

66 As a theoretical example of a situation in which ordinal and proportional rank are not  
 67 interchangeable, consider a hierarchy that contains 5 males. Those males will have ordinal ranks 1-5 and  
 68 proportional ranks 1, 0.75, 0.5, 0.25, and 0 (Figure 1, N=5). If, over time, four more males join the group  
 69 and are ranked at the bottom of the hierarchy, the ordinal ranks of the original 5 males will remain the same,  
 70 but their proportional ranks in the larger hierarchy will be 1, 0.875, 0.75, 0.625, 0.5 (Figure 1, N=9;  
 71 Figure S3). In this situation, a researcher who uses ordinal rank would conclude that the fifth-ranking  
 72 male in the hierarchy remained in a constant competitive position throughout the entire study period,  
 73 whereas a researcher who uses proportional rank would conclude that the fifth-ranking male  
 74 transitioned from a rank of 0 to 0.5, a major change in dominance rank. Which researcher is correct?  
 75 The answer depends on the nature of the competitive interactions for which dominance rank serves as a  
 76 proxy.

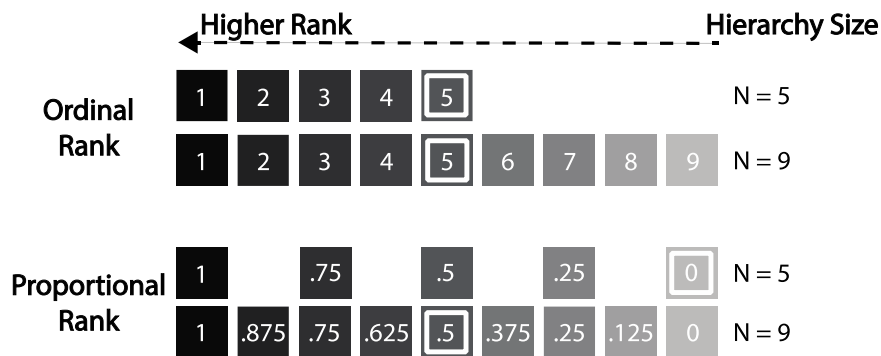

77  
 78 **Figure 1.** Differences between proportional and ordinal rank in two differently-sized hierarchies. Ranks  
 79 with darker shading have a competitive advantage over those with lighter shading. The fifth-ranking  
 80 individual in each hierarchy is demarcated with a white border. Under an ordinal rank framework, being  
 81 ranked 5<sup>th</sup> confers the same competitive advantages independent of hierarchy size. Under a  
 82 proportional rank framework, being ranked 5<sup>th</sup> is more advantageous in a hierarchy of 9 (proportional  
 83 rank = 0.5) than in a hierarchy of 5 (proportional rank = 0). Adapted from Levy et al. (in revision).

84  
 85 The relationship between hierarchy size and resource availability is integral to the assumptions  
 86 underlying the use of ordinal versus proportional rank metrics (Figure 2; Table S4). Using ordinal rank  
 87 assumes that the resource base over which individuals compete will not increase as group size increases  
 88 (Figure 2, orange lines). The result will be more intense competition, on average, in larger groups, and a  
 89 worse outcome for the lowest-ranking individuals in larger compared to smaller groups. In this scenario,  
 90 the most salient dominance measure for a focal individual is how many individuals are ranked above  
 91 that individual. For example, in non-synchronous, non-seasonal breeders such as baboons, only one or  
 92 two females are likely to be in estrous on any given day, even in large groups – other females may be  
 93 pregnant, lactating, or in a non-estrous phase of their cycle. This low daily availability of estrous females  
 94 results in a situation in which the resource over which males compete on a given day (estrous females)  
 95 increases more slowly than the number of males does, resulting in a decline in average per capita access  
 96 to estrous females as male hierarchy size increases (Figure 2). If the male dominance hierarchy functions  
 97 like a queue in which males wait for mating opportunities, a male's mating opportunities will not  
 98 depend on the number of other males in his hierarchy per se, but instead upon the number of males  
 99 that are ranked above him [59] (Table S4, competition for mates). *When average per-capita resource*  
 100 *access is density-dependent, we expect ordinal rank to be a better measure of competition and a better*  
 101 *predictor of traits determined by that competition compared to proportional rank.*

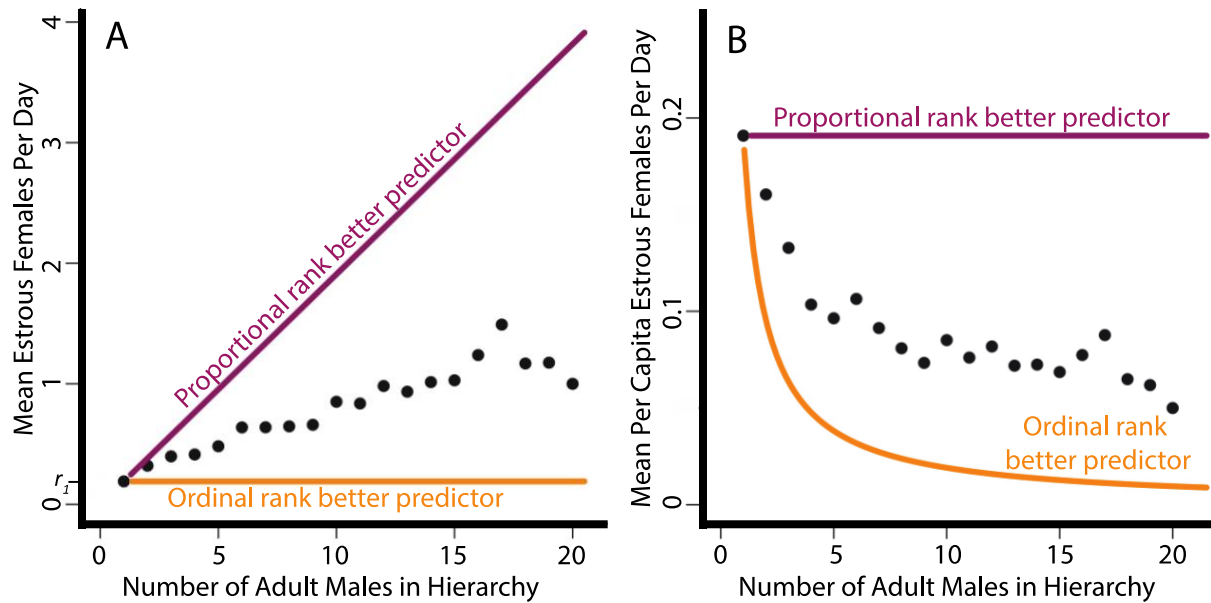

102

103 **Figure 2.** The theoretical and empirical relationships between hierarchy size (x-axis) and resource  
 104 availability (y-axis), using the example of estrous female baboons, a resource over which male baboons  
 105 compete for mating success. (A) The orange line shows a theoretical scenario in which the number of  
 106 estrous females in the group (total resource availability) is constant as the number of males in the  
 107 hierarchy increases; in this case, male mating success (the resulting measured trait) would be predicted  
 108 by ordinal rank. The purple line shows a scenario in which the number of estrous females increases in  
 109 proportion to the number of males in the hierarchy; in this case, male mating success would be  
 110 predicted by proportional rank. The slope of the orange line is 0 and the intercept is  $r_1$ , which designates  
 111 the quantity of resources available in a hierarchy size of 1 male ( $r_1 = 0.2$  estrus females in this figure).  
 112 This value,  $r_1$ , determines the slope of the purple line; i.e., for proportional rank to perfectly predict  
 113 mating success, resource availability must increase by  $r_1$ , the quantity available to the first male, as each  
 114 male is added to the hierarchy. The black points represent empirical data from Amboseli baboons: the  
 115 empirical relationship between male hierarchy size and the number of estrous females is positive, but  
 116 the slope is closer to the orange line than the purple line. Thus, we expect ordinal rank to best predict  
 117 mating success. (B) Similar to (A), but the number of estrous females is plotted per capita (i.e. per adult  
 118 male in the hierarchy). The orange line illustrates the case in which the resource stays constant across  
 119 different hierarchy sizes; thus, resources per capita decline as hierarchy size increases. The purple line  
 120 illustrates the case in which the resource base increases proportionately with hierarchy size; thus,  
 121 average per capita resource access is fixed. The black points represent the same empirical data as in (A).  
 122 Note that the framework above assumes that any given individual's ability to maintain control of a  
 123 resource is independent of group size.

124

125 In contrast, *when average per-capita resource availability is density-independent, such that a*  
 126 *larger hierarchy has a proportionately larger resource base, we expect proportional rank to be a better*  
 127 *measure of competition and a better predictor of traits determined by that competition compared to*  
 128 *ordinal rank* (Figure 2, purple lines). This situation might occur, for instance, in competition for food  
 129 when a hierarchy of 9 individuals has a home range nearly twice the size (with nearly twice the amount

130 of food) as a hierarchy of 5 individuals. The third-ranking individual in the hierarchy of five has  
131 approximately equal access to food as the fifth-ranking individual in the group of nine. In this scenario,  
132 the most salient dominance measure for a focal individual is the *proportion* of individuals that it  
133 outranks. The individual ranked 5 of 9 is outranked by four individuals, and the individual ranked 3 of 5 is  
134 outranked by only two individuals, but both are dominated by 50% of their group mates, and the greater  
135 resource base of the larger group means that these two individuals experience approximately the same  
136 resource access (Figure 2, purple lines; Table S4, competition for food).

137 We therefore predict that in any study system in which hierarchy size varies over time or across  
138 groups, some rank-related traits will be better predicted by ordinal rank and others will be better  
139 predicted by proportional rank. We argue that this difference in predictive power reflects the underlying  
140 competitive processes that shape the resulting traits – specifically, the relationship between hierarchy  
141 size and resource base. We assess this prediction by examining 20 traits measured as part of a long-term  
142 longitudinal study of a wild baboon population, in which both sexes form linear dominance hierarchies.  
143 By comparing the differential power of ordinal and proportional rank metrics to predict these 20 traits in  
144 this population, we perform the most extensive comparison to date of the ability of different rank  
145 metrics to predict traits.

**Table 1.** Trait descriptions,  $\Delta$ AICs, and study information for the 20 traits re-analyzed in the present study.

| Trait <sup>a</sup>                           | Originally Identified Rank Effect <sup>b</sup>                                                                 | Study Duration (years) | # of Social Groups | Preferred Model <sup>c</sup> | \DeltaAIC  (Ordinal vs. Proportional) | \DeltaAIC  (Preferred vs. Null) | Ref <sup>^</sup>      |
|----------------------------------------------|----------------------------------------------------------------------------------------------------------------|------------------------|--------------------|------------------------------|---------------------------------------|---------------------------------|-----------------------|
| Percent of consortships obtained (M)         | Higher-ranking males obtain more consortships                                                                  | 12                     | 7                  | Ordinal                      | 27                                    | 158                             | [60]                  |
| Fecal testosterone (M)                       | Higher-ranking males have higher testosterone levels                                                           | 9                      | 5                  | Ordinal                      | 24.9                                  | 27.1                            | [61]^                 |
| Post-partum amenorrhea duration (F)          | Higher-ranking females have shorter periods of post-partum amenorrhea                                          | 36                     | 13                 | Proportional                 | 8.5                                   | 25.9                            | [62]^                 |
| Inter-birth interval duration (F)            | Higher-ranking females have shorter inter-birth intervals                                                      | 36                     | 13                 | Neither                      | 1.3                                   | 14.8                            | [62]^                 |
| Body size (IM)                               | Juvenile males with higher-ranking mothers have larger body size for their age                                 | 1                      | 2                  | Ordinal                      | 7.2                                   | 15.9                            | [63]                  |
| Wound healing (M)                            | Higher-ranking males have faster rates of wound healing                                                        | 28                     | 11                 | Ordinal                      | 8                                     | 16                              | [64]                  |
| Monthly injury risk (F)                      | Higher-ranking (proportional) females have a lower risk of injury                                              | 29                     | 12                 | Proportional                 | 7.1                                   | 10.3                            | [56]^                 |
| Monthly injury risk (M)                      | Injury incidence is related to a quadratic rank term, with males ranked 3-6 having the highest rates of injury | 28                     | 11                 | Ordinal                      | 5.5                                   | 6.8                             | [64]                  |
| Prenatal fecal estrogen levels (F)           | Higher-ranking females have higher prenatal estrogen levels                                                    | 1.4                    | 5                  | Ordinal                      | 4.2                                   | 5.8                             | [65]                  |
| Fecal glucocorticoid levels (F) <sup>d</sup> | Higher-ranking females (proportional) have lower glucocorticoid levels                                         | 17                     | 12                 | Proportional                 | 3.0                                   | 1.7                             | Levy et al. (in rev)^ |
| Fecal glucocorticoid levels (IM)             | Subadult sons of higher-ranking mothers have lower glucocorticoid levels                                       | 4                      | 5                  | Neither                      | 0.2                                   | 4.4                             | [66]                  |

|                                    |                                                                                   |     |   |              |     |      |       |
|------------------------------------|-----------------------------------------------------------------------------------|-----|---|--------------|-----|------|-------|
| Fecal glucocorticoid levels (M)    | Higher-ranking males have lower glucocorticoid levels (except for the alpha male) | 9   | 5 | Ordinal      | 3.8 | 3.6  | [61]^ |
| Time off nipple (IB)               | Infants of higher-ranking females tended to spend more time on the nipple         | 1.4 | 5 | Ordinal      | 3.2 | 6.8  | [65]  |
| Initiation rate by infants (IF)    | No statistically significant effect of maternal rank on infant initiation rate    | 1.4 | 5 | Proportional | 3.4 | 2.5  | [65]  |
| Age at menarche (F)                | Females with higher-ranking mothers achieve menarche at younger ages              | 26  | 9 | Neither      | 0.7 | 2.6  | [67]  |
| Age at testicular enlargement (M)  | Males with higher-ranking mothers achieve testicular enlargement at younger ages  | 22  | 9 | Ordinal      | 8.5 | 2.3  | [67]  |
| Relative infant survival (F)       | Higher-ranking females have higher rates of infant survival                       | 16  | 6 | Neither      | 1.2 | 4.0  | [68]  |
| Sexual swelling length (F)         | Higher-ranking females have longer sexual swellings                               | 1.5 | 5 | Neither      | 0.1 | 2.4  | [69]^ |
| Social connectedness to males (F)  | Higher-ranking females are more socially connected to males                       | 16  | 8 | Ordinal      | 3.3 | 33.1 | [70]^ |
| Frequency of received grooming (F) | Higher-ranking females receive more grooming                                      | 2   | 5 | Ordinal      | 2.7 | 28.9 | [71]^ |

<sup>a</sup> M = trait measured in adult males; F = trait measured in adult females; B = trait measured in both males and females, no differentiation by sex;

I = trait measured in immature individuals, rank measured as maternal rank

<sup>b</sup> Ordinal rank unless otherwise noted

<sup>c</sup> "Neither" if  $|\Delta_{\text{ord-propAIC}}| < 2$

<sup>e</sup> Indicates that dataset is publicly available on Dryad

<sup>d</sup>  $\Delta\text{AIC}$  between Proportional and Null models = 1.7 (close to the 2-unit threshold) and 1% of the 95% CI of proportional rank overlapped with zero, so we included this trait in analysis



## 147 Results

148 We identified previous publications from the Amboseli Baboon Research Project that examined  
 149 relationships between rank and 20 different traits (Table 1). For each trait, we replicated the dataset and  
 150 statistical model used in the original manuscript, which used either ordinal or proportional rank, by  
 151 downloading data sets archived in Dryad or by querying the project’s long-term database when archived  
 152 data were not available. We then built three models for each trait: one using the original rank metric  
 153 (ordinal or proportional), a second using the alternative rank metric, and a null model that did not  
 154 include a measure of rank. All models included the same covariates that were used in the original  
 155 publication’s model (e.g., age, season, reproductive state). We extracted AIC scores for all three models  
 156 and used an AIC difference of  $> 2$  to indicate that one model was preferred over another, with  
 157 preference for the model with the smaller AIC value. This 2-unit cutoff is standard practice and  
 158 approximates a p-value of 0.05 [72,73](see Methods for additional details).

159

### 160 Rank metrics differ in their ability to predict traits

161 All 20 traits were better predicted by one or both rank metrics than by the null model ( $\Delta AIC > 2$ ).  
 162 Furthermore, for 15 of the 20 traits (75%), we found that one of the two rank metrics – ordinal or  
 163 proportional – performed substantially better than the other in predicting a given trait ( $\Delta AIC > 2$ ; Figure  
 164 3, Table 1). In addition, in 7 of these 15 models, only one of the two rank metrics performed better than  
 165 the null model. This means that for 35% of traits (7 of 20), a relationship between rank and a trait of  
 166 interest would have been undetected if researchers had chosen the alternative rank metric. For  
 167 example, male fecal glucocorticoid concentrations were predicted by ordinal rank ( $\Delta AIC$  to Null = 3.6),  
 168 but not by proportional rank ( $\Delta AIC$  to Null = -0.2).

169

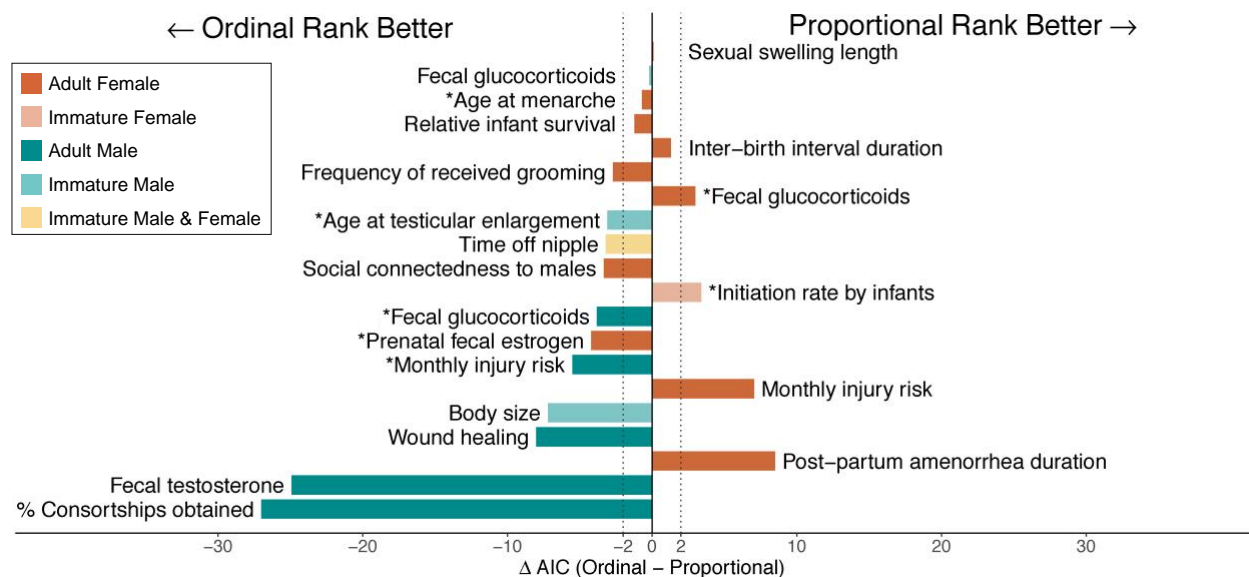

170

171 **Figure 3.** Visualization of model outcomes when predicting the same trait with ordinal versus  
 172 proportional rank. Each bar corresponds to a trait, and its value corresponds to a difference in AIC scores  
 173 between models that used ordinal versus proportional rank. Vertical dashed lines represent  $|\Delta AIC| = 2$ .  
 174 For traits whose bars are within the dashed lines, neither rank metric performed substantially better

175 than the other (5/20 analyses; we did not find any indication that the ability of the models to  
176 differentiate the predictive power of ordinal versus proportional rank depended on the duration of the  
177 study;  $p = 0.9$ , Pearson's product moment correlation). For traits whose bars are to the left of the  
178 dashed lines, ordinal rank was a better predictor of the trait than proportional rank (11/20), and vice  
179 versa for traits whose bars are to the right of the dashed lines (4/20). Colors of bars indicate sex (male,  
180 female, both), and shading indicates age class (adult or maternal rank of immatures). Asterisks indicate  
181 the seven traits for which only one rank metric predicted the trait better than the null model. The top  
182 two bars, sexual swelling length and fecal glucocorticoids, were traits measured in adult females and  
183 immature males, respectively.

184

185 *All male traits are better predicted by ordinal rank*

186 Whether proportional or ordinal rank was a better predictor of a trait was predicted by the sex  
187 of the study individuals, suggesting that male and female baboons experience different competitive  
188 regimes. Of the seven male traits that were better predicted by one rank metric than the other, all 7  
189 (100%) were best predicted by ordinal rank (male vs. chance  $p = 0.02$ , two-tailed binomial test). In  
190 contrast, of the seven female traits that were better predicted by one rank metric than the other, 4  
191 (57%) were best predicted by proportional rank, and 3 (43%) were best predicted by ordinal rank  
192 (female vs. chance  $p = 1.00$ , two-tailed binomial test; male vs. female  $p = 0.07$ , Fisher's exact test). In  
193 two of the three cases where traits could be directly compared between adult males and females (fecal  
194 glucocorticoid concentrations and monthly injury risk), male traits were better predicted by ordinal rank  
195 whereas female traits were better predicted by proportional rank. Additionally, the trait with the largest  
196 AIC difference between rank metrics was percent of consortships obtained by males, which was best  
197 predicted by ordinal rank. The ability of male baboons to obtain consortships with females approximates  
198 a queuing system [74], such that the most salient feature to a focal male is the number of males ranking  
199 higher than him. This pattern is consistent with our understanding of the contexts in which ordinal rank  
200 will be a better predictor of resource availability than proportional rank (see *Assumptions of ordinal and*  
201 *proportional rank metrics*, and Figure 2, above).

202

203 *All traits related to social and/or mating partners are best predicted by ordinal rank*

204 A second pattern that emerged from these results is that competition for social and mating  
205 partners in both sexes was better predicted by ordinal rank than by proportional rank. In all three cases  
206 where the trait could be interpreted in terms of access to social partners (male percent consortships  
207 obtained, female social connectedness to males, female frequency of received grooming from males or  
208 females), the trait was best predicted by ordinal rank. Furthermore, fecal testosterone concentrations in  
209 males, which are related to competition for female mating partners [75], was also much better  
210 predicted by ordinal rank than by proportional rank.

211

## 212 **Discussion**

213 Ordinal and proportional rank metrics make different assumptions about competitive regimes in  
214 animal societies. When average per capita resource access is density-dependent, ordinal rank should  
215 predict competition-related traits. In contrast, when average per capita resource access is density-  
216 independent, proportional rank should predict competition-related traits. In reality, competition within

217 animal social groups, which experience dynamic, ongoing changes in group size and resources, will rarely  
218 be purely density-dependent or density-independent. Instead, most competition will reflect a mix of  
219 these two regimes. This point is illustrated in Figure 2 for one resource important to males (number of  
220 estrous females); neither density-dependence nor density-independence perfectly describes the  
221 relationship between group size and resource availability. Nonetheless, in many contexts, one or the  
222 other competitive regime will predominate. In support, we have shown that proportional and ordinal  
223 rank metrics differ in how well they predict 75% (15/20) of rank-related traits examined in the Amboseli  
224 baboon population. Further, our data indicate that male and female traits tend to be shaped by  
225 different competitive regimes: males' competitive environments appear to be shaped mostly by density-  
226 dependent resource access, as evidenced by the strong and consistent performance of the ordinal rank  
227 metric in predicting many male phenotypes. In contrast, density-independent competition seems to  
228 better describe the competitive regimes that shape many (but not all) female traits. Our results also  
229 suggest that, for both sexes, average per-capita access to social and mating partners decreases as  
230 hierarchy size increases. Therefore, competition for social and mating partners may be better  
231 understood as a density-dependent process.

232 Because proportional and ordinal ranks reflect different assumptions about the competitive  
233 processes influencing social animals, the methods we use here can be applied in other social systems to  
234 inform researchers' understanding of the competitive processes operating in their study species. A  
235 researcher who tests proportional and ordinal rank models and finds that ordinal rank is a much  
236 stronger predictor of a trait (e.g., male access to females, Figures 2 & 3, Table S4) can conclude that  
237 average per-capita access to the resource declines as hierarchy size increases, and that competition for  
238 that resource is primarily a density-dependent process. In contrast, a finding that proportional rank  
239 better explains a trait (for example, post-partum amenorrhea duration in females, Figure 3), allows a  
240 researcher to conclude that the trait is shaped primarily by density-independent competitive processes,  
241 such that per-capita access to resources are relatively constant across hierarchy sizes. These methods  
242 and logic can also be applied to other rank metrics, such as Elo rating and coding individuals as alpha or  
243 non-alpha. Each metric assumes a different underlying competitive process – for example, coding  
244 individuals as alpha (highest-ranking) or non-alpha assumes that the alpha individual experiences a  
245 different level of resource competition than all others in the hierarchy, who in turn experience  
246 comparable resource competition with each other. Models that use each metric can then be compared  
247 via AIC score similarly to the present study (Levy et al, in revision).

248 Our study is the first systematic comparison of the ability of different dominance rank metrics to  
249 predict numerous traits in the same population. Proportional and ordinal ranks have rarely been  
250 explicitly compared; to our knowledge, only five studies, all in primate species, have previously  
251 compared the predictive ability of these two rank metrics. Two studies found that proportional rank  
252 better predicted the phenotypes in question than did ordinal rank (male consortship rates in rhesus  
253 macaques [55] and rates of injury among female baboons [52]). A third study, in female baboons, found  
254 that proportional rank better predicted fecal glucocorticoid concentrations than did ordinal rank, but  
255 whether a female had alpha status or not was an even better predictor than proportional rank (Levy et  
256 al., in revision). Similarly, a fourth study reported that a 'high versus low' categorical measure of rank  
257 better predicted female feeding time in rhesus macaques than did proportional or ordinal rank, with  
258 high-ranking females spending more time feeding than low-ranking females [76]. A fifth study found  
259 that neither proportional nor ordinal rank was a statistically significant predictor of the probability of  
260 conception in female blue monkeys [77]. In addition, several methods-based studies have tested  
261 whether rank orders differ depending on which metric is used to calculate dominance rank, but none  
262 have used empirical data to compare how rank metrics perform in predicting traits (e.g. [78–81]).

263 Our results also point to the value of long-term, individual-based research [82,83]. Without  
264 many years of data or data from multiple social groups, we would have been unable to detect  
265 differences in the explanatory power of proportional versus ordinal rank metrics. Through the  
266 comparison of these two metrics, we are able to gain a deeper understanding of the sex-specific  
267 competitive environments shaping different traits in our study population. We see the previously  
268 unappreciated differences in proportional and ordinal rank metrics not as a weakness of research that  
269 has already been performed, but as a new tool that can be employed in the study of diverse systems.

270 Our findings also have implications for meta-analyses and comparative studies of rank-related  
271 effects (e.g. [30,32,84]). It is paramount that, before including studies that employ different measures of  
272 rank, a meta-analyst considers whether rank metrics presented across multiple studies are equivalent.  
273 For example, studies that report effects of rank for “high” versus “low” ranking individuals create  
274 category thresholds based on either proportional or ordinal ranks, depending on whether “high” and  
275 “low” refers to social position relative to the whole population (ordinal rank) or to each social group  
276 individually (proportional rank). Further, if a study is reporting on only a single social group over a short  
277 time period, then hierarchy size is likely to be constant and therefore ordinal and proportional ranks  
278 would be equivalent. However, if a study is reporting on multiple study groups or even a single study  
279 group over a long time period, then rank metrics may no longer be interchangeable. We therefore  
280 recommend that meta-analysts assembling datasets from multiple studies should (1) carefully consider  
281 the underlying assumptions that link rank metrics to competitive landscapes in order to determine  
282 which rank metric is most appropriate, and (2) include only studies with equivalent rank metrics in a  
283 given meta-analysis, converting between rank metrics when possible and necessary. When following  
284 these recommendations is impracticable, meta-analysts should acknowledge the limitations of drawing  
285 inferences from studies with non-equivalent rank metrics.

286 We hope that our findings encourage other researchers working on long-term studies to  
287 perform similar analyses comparing the predictive power of proportional and ordinal rank metrics. We  
288 also encourage researchers to consider and explicitly state the latent assumptions that are made by  
289 using any particular rank metric and to consider if their traits of study are more likely to be explained by  
290 one rank metric versus another.

291

## 292 **Acknowledgements**

293 This project would not have been possible without long-term collaborators who have helped us  
294 maintain this project for nearly 50 years. We gratefully acknowledge the support of the National Science  
295 Foundation and the National Institutes of Health for the majority of the data represented here, currently  
296 through NSF IOS 1456832, and through NIH R01AG053308, R01AG053330, R01HD088558, and  
297 P01AG031719. We also thank Duke University, Princeton University, and the University of Notre Dame  
298 for financial and logistical support. We also thank the Kenya Wildlife Service, University of Nairobi,  
299 Kenya Institute of Primate Research, National Museums of Kenya, the Kenya National Council for  
300 Science, Technology and Innovation, and the Enduimet Wildlife Management Association. We also thank  
301 the members of the Amboseli-Longido pastoralist communities, Ker & Downey Safaris, Air Kenya, and  
302 Safarilink for their cooperation and assistance in the field. Particular thanks go to the Amboseli Baboon  
303 Research Project long-term field team - R.S. Mututua, S.N. Sayialel, J.K. Warutere, and I.L. Siodi - and to  
304 T. Wango and V. Oudu for their untiring assistance in Nairobi. The baboon project database, Babase, is  
305 designed and programmed by K. Pinc. This research was approved by the IACUC at Duke University,  
306 University of Notre Dame, and Princeton University and adhered to all the laws and guidelines of Kenya.

307 For a complete set of acknowledgments of funding sources, logistical assistance, and data collection and  
308 management, please visit <http://amboselibaboons.nd.edu/acknowledgements/>.

309

## 310 **Methods**

### 311 *Study Population*

312 The Amboseli Baboon Research Project is a long-term study of a natural population of savannah  
313 baboons located in Kenya's Amboseli basin. Data collection began in 1971 and continues today [85]. The  
314 population consists primarily of yellow baboons (*Papio cynocephalus*) that experience some naturally-  
315 occurring admixture with olive baboons (*P. anubis*) [86–88]. The number of social groups under  
316 observation at any given time has ranged from 1 to 6, varying either as a result of logistical  
317 considerations, group fissions, or group fusions. All individuals in study groups are visually recognized  
318 based on morphological and facial features. Near-daily demographic, environmental, and behavioral  
319 data have been collected throughout the study, and paternity data (beginning ca. 1995) and  
320 endocrinological data (beginning ca. 2000) have been collected for part of the study.

321

### 322 *Calculation of Dominance Rank*

323 Dominance ranks are determined by assigning wins and losses in dyadic agonistic interactions  
324 between same-sex individuals. Data on agonistic interactions are collected ad libitum during daily data  
325 collection, typically while the observer is simultaneously carrying out random-order focal animal  
326 sampling [89]. This sampling procedure ensures that observers continually move to new locations within  
327 the social group and observe focal individuals on a regular rotating basis. An individual is considered to  
328 win an agonistic interaction if they displace another individual, or if they give only aggressive or neutral  
329 gestures while their opponent gives only submissive gestures. All agonistic outcomes are entered into  
330 sex-specific dominance matrices (i.e., males are ranked separately from females). Individuals are placed  
331 in order of descending, sex-specific rank so as to minimize the number of entries that fall below the  
332 diagonals of the matrices [90,91]. Ranks are assigned for all group members every month. Only adult  
333 ranks are considered in this analysis.

334 Ordinal ranks are produced by numbering individuals according to the order in which they occur  
335 on the monthly matrix (1,2,3...n, where n = hierarchy size), with 1 being the highest-ranking male or  
336 female in the hierarchy and n being the lowest. Proportional ranks are computed as  $(1 - \frac{\text{ordinal rank}-1}{\text{hierarchy size}-1})$   
337 to produce ranks that fall in a range of [0,1] in every hierarchy, with 1 still being the  
338 highest-ranking male or female in the hierarchy and 0 being the lowest.

339

### 340 *Re-analysis of Previous Studies*

341 We aimed to test whether 20 different sex- and age-class-specific traits were better predicted  
342 by ordinal or proportional rank in the Amboseli baboon population. We first identified previous  
343 publications from the Amboseli project that reported statistically significant effects of rank on various  
344 traits. For a complete list of re-analyses performed, see Table 1.

345 Our methods of re-analysis followed three steps:

- 346  
347  
348  
349  
350  
351  
352  
353  
354  
355  
356  
357  
358  
359  
360  
361  
362  
363  
364  
365  
366  
367  
368  
369
1. We replicated as closely as possible the dataset used to produce the original analyses. In the case of datasets stored on the Dryad Digital Repository ([datadryad.org](http://datadryad.org)), these datasets could be matched exactly (see Table 1). If the original dataset was not deposited on Dryad, we re-extracted the dataset as well as we could from the Amboseli Baboon Research Project's long-term, relational database. However, the datasets we extracted were sometimes slightly different from those originally analyzed, because the database changes slightly over time as corrections are made. In all cases, we produced qualitatively close matches to the originally reported dataset in terms of sample sizes and summary statistics.
  2. We replicated as closely as possible the models presented in the original analysis. All re-analyses were carried out in R [92], even though some original analyses were carried out in SPSS, JMP, or SAS. In order to maintain consistency across all analyses reported here, all linear models, general linear models, and mixed effects models were built using the function *glmmTMB* [93]. All survival models were built using the function *coxph* [94]. In some cases, differences between the original study and our replication, either because of software differences or dataset differences, caused our replicated models to be slightly different from the original models. However, our re-analyses were qualitatively consistent with the original analyses.
  3. For each of the models described in step 2, we built two additional alternative models: (1) A model that replaced the rank term used in the original model with the alternative rank metric (proportional rank if ordinal rank was originally used and vice versa). (2) A null model that removed the rank term from the model. We then extracted AIC values from all three models to determine which model, if any, best fit the data. We interpreted an AIC difference of  $\geq 2$  to mean that one model was preferred over another, with preference for the model with a lower AIC score.

370

371 **Supplementary Materials: Identifying changes in the relationship between ordinal and proportional**  
372 **ranks over time**

373 In long-term studies, hierarchy size varies over time and across social groups. This variation  
374 should simultaneously weaken the relationship between ordinal and proportional rank and increase our  
375 ability to measure different competitive processes in social groups. To test the prediction that the  
376 relationship between ordinal and proportional ranks weakens as studies progress, we measured the  
377 correlation between monthly ordinal and proportional ranks in the Amboseli Baboon Research Project  
378 dataset over increasingly longer periods of time.

379 Specifically, for each social group we have studied (N = 17 groups), we calculated the  $R^2$  values  
380 from linear models that predicted proportional rank as a function of ordinal rank using increasingly  
381 larger datasets. The decision of which metric to use as the predictor variable, in this case ordinal rank,  
382 and which as the response variable, in this case proportional rank, was random and had no effect on the  
383 results of these analyses. We began by calculating this correlation using only rank data from the first  
384 month that a group was under observation ( $R^2$  necessarily = 1). We then repeated this  $R^2$  calculation  
385 iteratively, each time drawing on ever-larger datasets, by adding data in 12-month increments (i.e. 13  
386 total months, 25 total months, 37 total months, etc.), until we reached the last available dataset of ranks  
387 for a group (see Table S1 an example dataset). This method allowed us to track the strength of the  
388 predictive relationship between ordinal and proportional ranks as the study progressed.

389 These analyses included a total of 17 social groups that have been studied over the last 40+  
390 years (thin black lines in Figure S2). We also repeated the same approach, combining data from all social  
391 groups into a single analysis (thick grey lines in Figure S2), allowing us to qualitatively compare patterns  
392 of change in the relationship between ordinal and proportional ranks both within social groups and  
393 across the study population. Note that at the start of the project, only a single social group was followed  
394 (Alto's group). As a result, the grey line starts at an  $R^2$  value of 1. If multiple study groups with different  
395 group sizes had been followed at the beginning of the study, the  $R^2$  value at the beginning of the project  
396 would have been < 1.

397 **Table S1.** Example dominance ranks from seven individuals across three months and how these data  
398 would be used to calculate  $R^2$  values via a linear model for predicting proportional rank from ordinal  
399 rank. To calculate the relationship between ordinal and proportional ranks across the 3 months in the  
400 table (January, February, and March 2016), every row in this dataset would be used in a linear model in  
401 which proportional rank is the response variable and ordinal rank is the predictor variable. Individual  
402 identity did not factor into the model or calculation of  $R^2$ , so the switch in rank order between  
403 individuals C, D, and E from February to March 2016 is irrelevant. What does, however, reduce  $R^2$  is the  
404 addition of individual G to the group in February 2016, and the loss of individual G from the group in  
405 March 2016.

| Individual Identity | Year-Month | Ordinal Rank | Proportional Rank |
|---------------------|------------|--------------|-------------------|
| A                   | Jan-2016   | 1            | 1                 |
| B                   | Jan-2016   | 2            | 0.8               |
| C                   | Jan-2016   | 3            | 0.6               |
| D                   | Jan-2016   | 4            | 0.4               |
| E                   | Jan-2016   | 5            | 0.2               |
| F                   | Jan-2016   | 6            | 0                 |
| A                   | Feb-2016   | 1            | 1                 |

|   |          |   |        |
|---|----------|---|--------|
| B | Feb-2016 | 2 | 0.8333 |
| C | Feb-2016 | 3 | 0.6667 |
| D | Feb-2016 | 4 | 0.5    |
| E | Feb-2016 | 5 | 0.3333 |
| F | Feb-2016 | 6 | 0.1667 |
| G | Feb-2016 | 7 | 0      |
| A | Mar-2016 | 1 | 1      |
| B | Mar-2016 | 2 | 0.8    |
| E | Mar-2016 | 5 | 0.2    |
| C | Mar-2016 | 4 | 0.4    |
| D | Mar-2016 | 3 | 0.6    |
| F | Mar-2016 | 6 | 0      |

406

407 As predicted, the correlation between ordinal and proportional ranks both within and across  
408 study groups decreased as the length of study increased (Figure S2). This is because the size of adult  
409 female and male hierarchies changed over time. Variation in hierarchy size, in turn, decouples our  
410 density-independent rank metric (proportional) from our density-dependent rank metric (ordinal). This  
411 decline in  $R^2$  as the length of study increased was seen in each group individually and across all study  
412 groups when all data were combined (i.e., across the study population).

413 The decline in  $R^2$  over time was apparent in both male and female ranks, although the decline  
414 occurred more quickly and less linearly in the male rank data than in the female rank data. This sex  
415 difference, which we did not predict, prompted us to form two post-hoc predictions to explain it. (1)  
416 Baboon groups contained fewer adult males than females; hence hierarchy sizes are smaller for males  
417 than for females. The addition of one individual to a small hierarchy changes all members' proportional  
418 ranks more than the addition of one individual to a large hierarchy (Figure S3). Thus, if we assume that  
419 different-sized groups have comparable rates of maturation, death, and dispersal, the relationship  
420 between ordinal and proportional ranks would be weaker in smaller hierarchies than larger hierarchies.  
421 (2) Changes in male hierarchy size were more common than changes in female hierarchy size due to  
422 frequent male dispersal, and all changes in hierarchy size reduce the relationship between ordinal and  
423 proportional ranks. Together, we would expect these two sex differences – in average hierarchy size and  
424 in the frequency of changes in hierarchy size – to lead to differences in the relationship between ordinal  
425 and proportional rank between males and females (Figure S3).

426 We performed post-hoc analyses and confirmed both of our predictions. Of the 1,637 group-  
427 months for which we had rank data for both males and females, adult males outnumbered adult  
428 females in only 14 months (<1% of group-months; mean # of females - mean # of males  $\pm$  SD =  $7.4 \pm 0.1$ ,  
429  $p < 0.0001$  in one-sample, two-tailed t-test). Additionally, on average, the number of adult males in a  
430 social group changed more from one month to the next as compared to the number of adult females  
431 (mean absolute change in # adult males per month  $\pm$  SD =  $0.59 \pm 0.02$ , mean in adult females  $\pm$  SD =  $0.25$   
432  $\pm 0.01$ ,  $p < 0.0001$  in two-sample, two-tailed t-test).



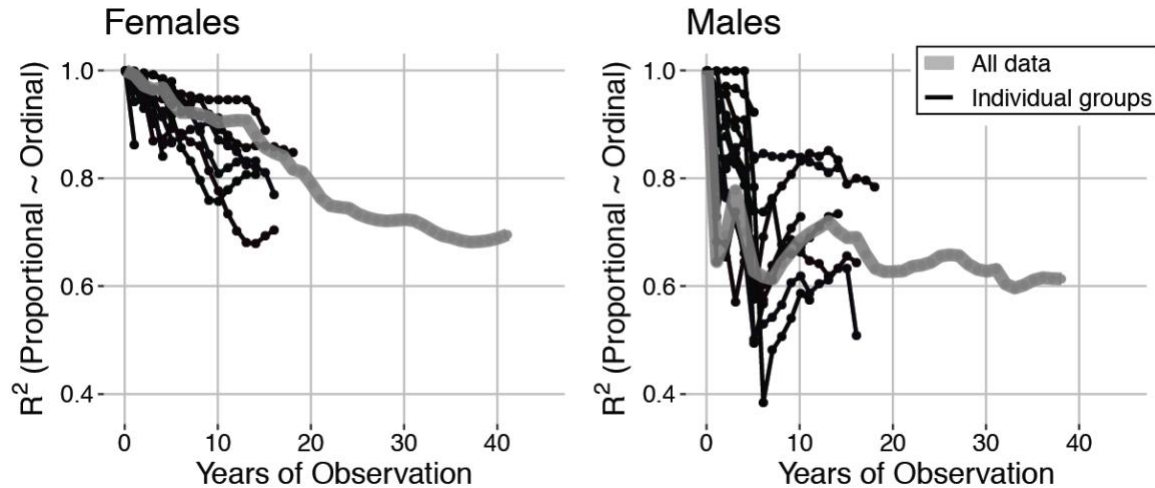

433

434 **Figure S2.** The relationship between ordinal and proportional ranks weakens as the period of  
435 observation increases in both females and males. Black points and lines indicate changes in  $R^2$  for every  
436 social group over time, and the grey points and lines indicate changes across all social groups (i.e. across  
437 the study population) using pooled data from all individuals in all social groups. At each point,  $R^2$  was  
438 calculated from the cumulative dataset (e.g. the grey point at 13 months includes data from all 13  
439 months across all individuals in all social groups). The grey line extends farther than any black line  
440 because the black lines represent individual social groups, which are not permanent due to fissions and  
441 fusions, whereas the grey line represents the full dataset.

442 **Supplementary Figures and Tables:**

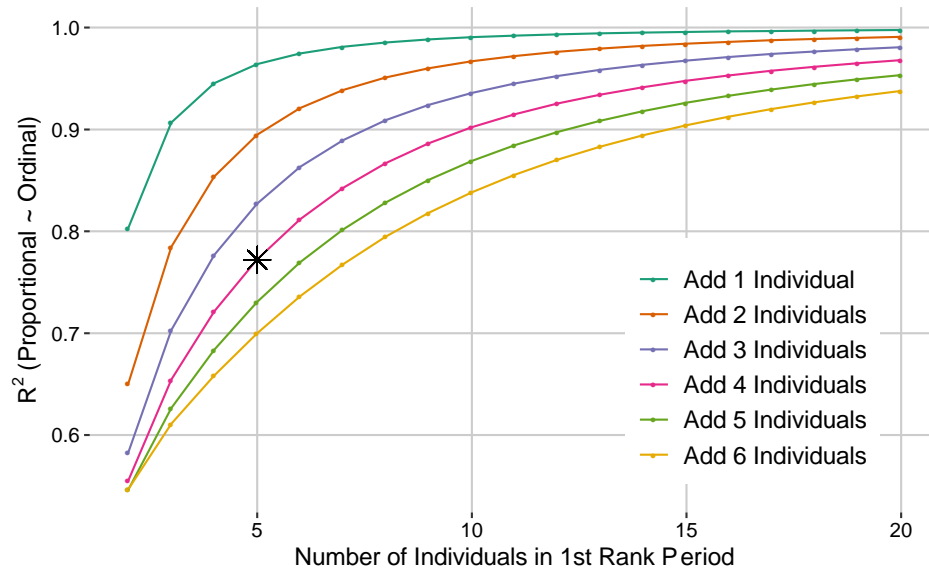

443

444 **Figure S3.** The relationship between ordinal and proportional ranks is weakened when hierarchy size  
 445 changes. We simulated groups that included a varying numbers of adults (range 2-20) and assigned  
 446 ordinal and proportional ranks to each individual for one rank period (one month). We then added a  
 447 varying number of individuals to the group, and again assigned ordinal and proportional ranks to each  
 448 individual for a second ranking period. We then calculated the  $R^2$  value from a model that predicted  
 449 proportional rank as a function of ordinal rank, including all ranks from both ranking periods. The  
 450 relationship between ordinal and proportional ranks is less robust to greater changes in hierarchy size  
 451 and less robust to changes in smaller starting hierarchies. The situation described in the introduction, in  
 452 which four males join an existing group of five males, is marked with an asterisk.

453

454 **Table S4.** Theoretical distribution of resources under density-independent and density-dependent  
 455 competition for two group sizes to demonstrate theoretical differences between ordinal and  
 456 proportional ranks.

| <b>Density-Independent Competition:</b><br>Competition for Food |                  |                         |                  | <b>Density-Dependent Competition:</b><br>Competition for Mates |                   |                   |                         |
|-----------------------------------------------------------------|------------------|-------------------------|------------------|----------------------------------------------------------------|-------------------|-------------------|-------------------------|
| Group Size = 5                                                  |                  | Group Size = 9          |                  | Group Size = 5                                                 |                   | Group Size = 9    |                         |
| Ord. Rank<br>[Prop. Rank]                                       | Food<br>Obtained | Ord Rank<br>[Prop Rank] | Food<br>Obtained | Ord. Rank<br>[Prop. Rank]                                      | Mates<br>Obtained | Mates<br>Obtained | Ord Rank<br>[Prop Rank] |
| 1<br>[1.00]                                                     | 3                | 1<br>[1.00]             | 3                | 1<br>[1.00]                                                    | 1                 | 1<br>[1.00]       | 1                       |
|                                                                 |                  | 2<br>[0.88]             | 2.75             |                                                                |                   | 2<br>[0.88]       | 1                       |
| 2<br>[0.75]                                                     | 2.5              | 3<br>[0.75]             | 2.5              | 2<br>[0.75]                                                    | 1                 | 3<br>[0.75]       | 1                       |
|                                                                 |                  | 4<br>[0.63]             | 2.25             |                                                                |                   | 4<br>[0.63]       | 0                       |
| <b>3*</b>                                                       | <b>2.0</b>       | <b>5</b>                | <b>2.0</b>       | <b>3*</b>                                                      | <b>1</b>          | <b>5</b>          | <b>0</b>                |

|                             |     |                |      |                               |   |                    |   |
|-----------------------------|-----|----------------|------|-------------------------------|---|--------------------|---|
| <b>[0.50]</b>               |     | <b>[0.50]</b>  |      | <b>[0.50]</b>                 |   | <b>[0.50]</b>      |   |
|                             |     | 6<br>[0.38]    | 1.75 |                               |   | 6<br>[0.38]        | 0 |
| 4<br>[0.25]                 | 1.5 | 7<br>[0.25]    | 1.5  | 4<br>[0.25]                   | 0 | 7<br>[0.25]        | 0 |
|                             |     | 8<br>[0.13]    | 1.25 |                               |   | 8<br>[0.13]        | 0 |
| 5<br>[0.00]                 | 1.0 | 9<br>[0.00]    | 1.0  | 5<br>[0.00]                   | 0 | 9<br>[0.00]        | 0 |
| Per Capita = 2 <sup>^</sup> |     | Per Capita = 2 |      | Per Capita = 0.6 <sup>^</sup> |   | Per Capita = 0.333 |   |

457

458 \* The middle-ranking individual in each group is bolded for comparison. Under density-independent  
 459 competition, access to resources is determined by proportional rank. The middle-ranking animal  
 460 obtains 2 units of food regardless of ordinal rank or hierarchy size. Under density-dependent selection,  
 461 access to resources is determined by ordinal rank. The middle-ranking animal obtains 1 mate when its  
 462 ordinal rank is 3 but 0 mates when its ordinal rank is 5.

463 <sup>^</sup> Under density-independent competition, per capita resource access remains constant as hierarchy size  
 464 increases. Under density-dependent competition, per capita resource access declines as hierarchy size  
 465 increases.

## References:

1. Huber P. 1802 Observations on several species of the genus *Apis*, known by the name of Huble-bees, and called *Bombinatrices* by Linnaeus. *Trans. Linn. Soc. London* **1**, 214–298.
2. Pardi L. 1948 Dominance order in *Polistes* wasps. *Physiol. Zool.* **21**, 1–13. (doi:10.1086/physzool.21.1.30151976)
3. Ewing L. 1972 Hierarchy and its relation to territory in the cockroach *Nauphoeta cinera*. *Behavior* **42**, 152–174.
4. Monnin T, Peeters C. 1999 Dominance hierarchy and reproductive conflicts among subordinates in a monogynous queenless ant. *Behav. Ecol.* **10**, 323–332. (doi:10.1093/beheco/10.3.323)
5. Bovbjerg R V. 1953 Dominance order in the crayfish *Orconectes virilis* (Hagen). *Physiol. Zool.* **26**, 173–178. (doi:10.1086/physzool.26.2.30154514)
6. Copp N. 1986 Dominance hierarchies in the crayfish *Procambarus clarkii* (Girard, 1852) and the question of learned individual recognition (Decapoda, Astacidea). *Crustaceana* **51**, 9–24.
7. Correa C, Baeza JA, Hinojosa IA, Thiel M. 2003 Male dominance hierarchy and mating tactics in the rock shrimp *Rhynchocinetes typus* (Decapoda: Caridea). *J. Crustac. Biol.* **23**, 33–45. (doi:10.1163/20021975-99990313)
8. Ang TZ, Manica A. 2010 Aggression, segregation and stability in a dominance hierarchy. *Proc. R. Soc. B Biol. Sci.* **277**, 1337–1343. (doi:10.1098/rspb.2009.1839)
9. Sloman KA, Wilson L, Freel JA, Taylor AC, Metcalfe NB, Gilmour KM. 2002 The effects of increased flow rates on linear dominance hierarchies and physiological function in brown trout, *Salmo trutta*. *Can. J. Zool.* **80**, 1221–1227. (doi:10.1139/z02-105)
10. Newman MA. 1956 Social Behavior and Interspecific Competition in Two Trout Species. *Physiol. Zool.* **29**, 64–81. (doi:10.1086/physzool.29.1.30152381)
11. Oliveira RF, Almada VC. 1996 On the (in)stability of dominance hierarchies in the cichlid fish *Oreochromis mossambicus*. *Aggress. Behav.* **22**, 37–45. (doi:10.1002/(SICI)1098-2337(1996)22:1<37::AID-AB4>3.0.CO;2-R)
12. Paz-y-Miño C G, Bond AB, Kamil AC, Balda RP. 2004 Pinyon jays use transitive inference to predict social dominance. *Nature* **430**, 778–781. (doi:10.1038/nature02723)
13. Poisbleau M, Fritz H, Guillon N, Chastel O. 2005 Linear social dominance hierarchy and corticosterone responses in male mallards and pintails. *Horm. Behav.* **47**, 485–492. (doi:10.1016/J.YHBEH.2005.01.001)
14. Piper WH. 1997 Social dominance in birds. In *Current Ornithology* (eds V Nolan, ED Ketterson, CF Thompson), pp. 125–187. Boston, MA: Springer US. (doi:10.1007/978-1-4757-9915-6\_4)
15. Hegner RE. 1985 Dominance and anti-predator behaviour in blue tits (*Parus caeruleus*). *Anim. Behav.* **33**, 762–768. (doi:10.1016/S0003-3472(85)80008-7)
16. Valderrábano-Ibarra C, Brumon I, Drummond H. 2007 Development of a linear dominance hierarchy in nestling birds. *Anim. Behav.* **74**, 1705–1714. (doi:10.1016/J.ANBEHAV.2007.02.034)
17. Schjelderup-Ebbe T. 1922 Beiträge zur Sozialpsychologie des Haushuhns [Observation on the

- social psychology of domestic fowls]. *Zeitschrift für Psychol. und Physiol. der Sinnesorgane. Abt. 1. Zeitschrift für Psychol.* **88**, 225–252.
18. Clutton-Brock TH, Albon SD, Guinness FE. 1984 Maternal dominance, breeding success and birth sex ratios in red deer. *Nature* **308**, 358–360. (doi:10.1038/308358a0)
  19. Holekamp K, Smale L. 1991 Dominance acquisition during mammalian social development: the “inheritance” of maternal rank. *Am. Zool.* **31**, 306–317. (doi:10.1093/icb/31.2.306)
  20. Herrera EA, Macdonald DW. 1993 Aggression, dominance, and mating success among capybara males (*Hydrochaeris hydrochaeris*). *Behav. Ecol.* **4**, 114–119. (doi:10.1093/beheco/4.2.114)
  21. Tilson RL, Hamilton WJ. 1984 Social dominance and feeding patterns of spotted hyaenas. *Anim. Behav.* **32**, 715–724. (doi:10.1016/S0003-3472(84)80147-5)
  22. Meese GB, Ewbank R. 1973 The establishment and nature of the dominance hierarchy in the domesticated pig. *Anim. Behav.* **21**, 326–334. (doi:10.1016/S0003-3472(73)80074-0)
  23. Sapolsky R. 1993 The physiology of dominance in stable versus unstable social hierarchies. In *Primate Social Conflict* (eds W Mason, S Mendoza), pp. 171–204. Albany, NY: State University of New York Press.
  24. Abbott D. *et al.* 2003 Are subordinates always stressed? a comparative analysis of rank differences in cortisol levels among primates. *Horm. Behav.* **43**, 67–82. (doi:10.1016/S0018-506X(02)00037-5)
  25. Creel S. 2001 Social dominance and stress hormones. *Trends Ecol. Evol.* **16**, 491–497. (doi:10.1016/S0169-5347(01)02227-3)
  26. Habig B, Doellman MM, Woods K, Olansen J, Archie EA. 2018 Social status and parasitism in male and female vertebrates: A meta-analysis. *Sci. Rep.* **8**, 1–13. (doi:10.1038/s41598-018-21994-7)
  27. Snyder-Mackler N *et al.* 2016 Social status alters immune regulation and response to infection in macaques. *Science (80-. ).* **354**.
  28. Sapolsky RM. 2004 Social Status and Health in Humans and Other Animals. *Annu. Rev. Anthropol.* **33**, 393–418. (doi:10.1146/annurev.anthro.33.070203.144000)
  29. Hawley DM, Jennelle CS, Sydenstricker K V., Dhondt AA. 2007 Pathogen resistance and immunocompetence covary with social status in house finches (*Carpodacus mexicanus*). *Funct. Ecol.* **21**, 520–527. (doi:10.1111/j.1365-2435.2007.01254.x)
  30. Majolo B, Lehmann J, de Bortoli Vizioli A, Schino G. 2012 Fitness-related benefits of dominance in primates. *Am. J. Phys. Anthropol.* **147**, 652–660. (doi:10.1002/ajpa.22031)
  31. Isbell LA, Pruett JD, Lewis M, Young TP. 1999 Rank Differences in Ecological Behavior: A Comparative Study of Patas Monkeys (*Erythrocebus patas*) and Vervets (*Cercopithecus aethiops*). *Int. J. Primatol.* **20**, 257–272. (doi:10.1023/A:1020574504017)
  32. Schino G. 2001 Grooming, competition and social rank among female primates: a meta-analysis. *Anim. Behav.* **62**, 265–271. (doi:10.1006/ANBE.2001.1750)
  33. Creel S, Creel NM, Mills MGL, Monfort SL. 1997 Rank and reproduction in cooperatively breeding African wild dogs: behavioral and endocrine correlates. *Behav. Ecol.* **8**, 298–306.

(doi:10.1093/beheco/8.3.298)

34. Clutton-Brock TH, Albon SD, Guinness FE. 1984 Maternal dominance, breeding success and birth sex ratios in red deer. *Nature* **308**, 358–360. (doi:10.1038/308358a0)
35. van Noordwijk MA, van Schaik CP. 1999 The effects of dominance rank and group size on female lifetime reproductive success in wild long-tailed macaques, *Macaca fascicularis*. *Primates* **40**, 105–130. (doi:10.1007/BF02557705)
36. Newton-Fisher NE. 2004 Hierarchy and social status in Budongo chimpanzees. *Primates* **45**, 81–87. (doi:10.1007/s10329-003-0064-6)
37. Fairbanks LA, McGuire MT. 1984 Determinants of fecundity and reproductive success in captive vervet monkeys. *Am. J. Primatol.* **7**, 27–38. (doi:10.1002/ajp.1350070106)
38. Holekamp KE, Smale L, Szykman M. 1996 Rank and reproduction in the female spotted hyaena. *J. Reprod. Fertil.* **108**, 229–37. (doi:10.1530/JRF.0.1080229)
39. Koivula K, Orell M. 1988 Social rank and winter survival in the Willow Tit *Parus montanus*. *Ornis Fenn.* **65**, 114–120.
40. Ekman J. 1990 Alliances in winter flocks of willow tits; effects of rank on survival and reproductive success in male-female associations. *Behav. Ecol. Sociobiol.* **26**, 239–245. (doi:10.1007/BF00178317)
41. Desrochers A, Hannon SJ, Nordin KE. 1990 Winter Survival and Territory Acquisition in a Northern Population of Black-Capped Chickadees. *Auk.* **105**, 727–736. (doi:10.2307/4087386)
42. Pusey A, Williams J, Goodall J. 1997 The influence of dominance rank on the reproductive success of female chimpanzees. *Science* **277**, 828–31. (doi:10.1126/SCIENCE.277.5327.828)
43. Silk JB, Alberts SC, Altmann J. 2003 Social bonds of female baboons enhance infant survival. *Science* **302**, 1231–4. (doi:10.1126/science.1088580)
44. Albers PCH, De Vries H. 2001 Elo-rating as a tool in the sequential estimation of dominance strengths. *Anim. Behav.* **61**, 489–495. (doi:10.1006/anbe.2000.1571)
45. David HA. 1987 Ranking from unbalanced paired-comparison data. *Biometrika.* **74**.
46. Harcourt AH, Stewart KJ. 1987 The influence of help in contests on dominance rank in primates: hints from gorillas. *Anim. Behav.* **35**, 182–190. (doi:10.1016/S0003-3472(87)80223-3)
47. Huchard E, Alvergne A, Féjan D, Knapp LA, Cowlshaw G, Raymond M. 2010 More than friends? Behavioural and genetic aspects of heterosexual associations in wild chacma baboons. *Behav. Ecol. Sociobiol.* **64**, 769–781. (doi:10.1007/s00265-009-0894-3)
48. Langergraber KE, Mitani JC, Watts DP, Vigilant L. 2013 Male–female socio-spatial relationships and reproduction in wild chimpanzees. *Behav. Ecol. Sociobiol.* **67**, 861–873. (doi:10.1007/s00265-013-1509-6)
49. Langergraber KE, Watts DP, Vigilant L, Mitani JC. 2017 Group augmentation, collective action, and territorial boundary patrols by male chimpanzees. *Proc. Natl. Acad. Sci. U. S. A.* **114**, 7337–7342. (doi:10.1073/pnas.1701582114)
50. Thompson NA, Cords M. 2018 Stronger social bonds do not always predict greater longevity in a

- gregarious primate. *Ecol. Evol.* **8**, 1604–1614. (doi:10.1002/ece3.3781)
51. Kerhoas D, Perwitasari-Farajallah D, Agil M, Widdig A, Engelhardt A. 2014 Social and ecological factors influencing offspring survival in wild macaques. *Behav. Ecol.* **25**, 1164–1172. (doi:10.1093/beheco/aru099)
  52. Archie EA, Altmann J, Alberts SC. 2014 Costs of reproduction in a long-lived female primate: injury risk and wound healing. *Behav. Ecol. Sociobiol.* **68**, 1183–1193. (doi:10.1007/s00265-014-1729-4)
  53. Packer C, Collins DA, Eberly LE. 2000 Problems with primate sex ratios. *Philos. Trans. R. Soc. Lond. B. Biol. Sci.* **355**, 1627–35. (doi:10.1098/rstb.2000.0725)
  54. Benavides JA, Huchard E, Pettorelli N, King AJ, Brown ME, Archer CE, Appleton CC, Raymond M, Cowlishaw G. 2012 From parasite encounter to infection: Multiple-scale drivers of parasite richness in a wild social primate population. *Am. J. Phys. Anthropol.* **147**, 52–63. (doi:10.1002/ajpa.21627)
  55. Rakhovskaya M V. 2013 Correlates of Male Consortship Rate in Free-Ranging Rhesus Macaques (*Macaca mulatta*). *Int. J. Primatol.* **34**, 662–680. (doi:10.1007/s10764-013-9686-8)
  56. Archie EA, Altmann J, Alberts SC. 2014 Costs of reproduction in a long-lived female primate: Injury risk and wound healing. *Behav. Ecol. Sociobiol.* **68**, 1183–1193. (doi:10.1007/s00265-014-1729-4)
  57. Richards SM. 1974 The concept of dominance and methods of assessment. *Anim. Behav.* **22**, 914–930. (doi:10.1016/0003-3472(74)90015-3)
  58. Bernstein IS. 1981 Dominance relationships and ranks: Explanations, correlations, and empirical challenges. *Behav. Brain Sci.* **4**, 449. (doi:10.1017/S0140525X00009857)
  59. Altmann SA. 1962 A field study of the sociobiology of rhesus monkeys, *Macaca mulatta*. *Ann. N. Y. Acad. Sci.* **102**, 338–435. (doi:10.1111/j.1749-6632.1962.tb13650.x)
  60. Alberts SC, Buchan JC, Altmann J. 2006 Sexual selection in wild baboons: from mating opportunities to paternity success. *Anim. Behav.* **72**, 1177–1196. (doi:10.1016/j.anbehav.2006.05.001)
  61. Gesquiere LR, Learn NH, Simao MCM, Onyango PO, Alberts SC, Altmann J. 2011 Life at the top: rank and stress in wild male baboons. *Science* **333**, 357–60. (doi:10.1126/science.1207120)
  62. Gesquiere LR, Altmann J, Archie EA, Alberts SC. 2018 Interbirth intervals in wild baboons: environmental predictors and hormonal correlates. *Am. J. Phys. Anthropol.* **166**, 107–126. (doi:10.1002/ajpa.23407)
  63. Altmann J, Alberts SC. 2005 Growth rates in a wild primate population: Ecological influences and maternal effects. *Behav. Ecol. Sociobiol.* **57**, 490–501. (doi:10.1007/s00265-004-0870-x)
  64. Archie EA, Altmann J, Alberts SC. 2012 Social status predicts wound healing in wild baboons. *Proc. Natl. Acad. Sci. U. S. A.* **109**, 9017–22. (doi:10.1073/pnas.1206391109)
  65. Nguyen N, Gesquiere L, Alberts SC, Altmann J. 2012 Sex differences in the mother-neonate relationship in wild baboons: Social, experiential and hormonal correlates. *Anim. Behav.* **83**, 891–903. (doi:10.1016/j.anbehav.2012.01.003)

66. Onyango PO, Gesquiere LR, Wango EO, Alberts SC, Altmann J. 2008 Persistence of maternal effects in baboons: Mother's dominance rank at son's conception predicts stress hormone levels in subadult males. *Horm. Behav.* **54**, 319–324. (doi:10.1016/j.yhbeh.2008.03.002)
67. Charpentier MJE, Tung J, Altmann J, Alberts SC. 2008 Age at maturity in wild baboons: genetic, environmental and demographic influences. *Mol. Ecol.* **17**, 2026–2040. (doi:10.1111/j.1365-294X.2008.03724.x)
68. Silk JB, Alberts SC, Altmann J. 2003 Social bonds of female baboons enhance infant survival. *Science (80-. )*. **302**, 1231–1234. (doi:10.1126/science.1088474)
69. Fitzpatrick CL, Altmann J, Alberts SC. 2014 Sources of variance in a female fertility signal: Exaggerated estrous swellings in a natural population of baboons. *Behav. Ecol. Sociobiol.* **68**, 1109–1122. (doi:10.1007/s00265-014-1722-y)
70. Archie EA, Tung J, Clark M, Altmann J, Alberts SC. 2014 Social affiliation matters: both same-sex and opposite-sex relationships predict survival in wild female baboons. *Proc R. Soc L. B Biol. Sci* **281**, 20141261. (doi:10.1098/rspb.2014.1261)
71. Akinyi MY, Tung J, Jeneby M, Patel NB, Altmann J, Alberts SC. 2013 Role of grooming in reducing tick load in wild baboons (*Papio cynocephalus*). *Anim. Behav.* **85**, 559–568. (doi:10.1016/j.anbehav.2012.12.012)
72. Burnham KP, Anderson DR. 2002 *Model selection and multimodel inference: A practical information-theoretic approach*. 2nd edn. New York: Springer-Verlag. (doi:10.1007/b97636)
73. Murtaugh PA. 2014 In defense of *P* values. *Ecology* **95**, 611–617. (doi:10.1890/13-0590.1)
74. Alberts SC, Watts HE, Altmann J. 2003 Queuing and queue jumping: Long term patterns of dominance rank and mating success in male savannah baboons. *Anim. Behav.* **65**, 821–840. (doi:10.1006/anbe.2003.2106)
75. Onyango PO, Gesquiere LR, Altmann J, Alberts SC. 2013 Testosterone positively associated with both male mating effort and paternal behavior in savanna baboons (*Papio cynocephalus*). *Horm. Behav.* **63**, 430–436. (doi:10.1016/j.yhbeh.2012.11.014)
76. Johnson RL, Malik I, Berman CM. 1991 Age- and dominance-related variation in feeding time among free-ranging female rhesus monkeys. *Int. J. Primatol.* **12**, 337–356. (doi:10.1007/BF02547616)
77. Roberts SJ, Cords M. 2013 Group size but not dominance rank predicts the probability of conception in a frugivorous primate. *Behav. Ecol. Sociobiol.* **67**, 1995–2009. (doi:10.1007/s00265-013-1607-5)
78. Bang A, Deshpande S, Sumana A, Gadagkar R. 2010 Choosing an appropriate index to construct dominance hierarchies in animal societies: a comparison of three indices. *Anim. Behav.* **79**, 631–636. (doi:10.1016/j.anbehav.2009.12.009)
79. Douglas PH, Ngonga Ngomo AC, Hohmann G. 2017 A novel approach for dominance assessment in gregarious species: ADAGIO. *Anim. Behav.* **123**, 21–32. (doi:10.1016/j.anbehav.2016.10.014)
80. De Vries H, Stevens JMG, Vervaecke H. 2006 Measuring and testing the steepness of dominance hierarchies. *Anim. Behav.* **71**, 585–592. (doi:10.1016/j.anbehav.2005.05.015)



81. Balasubramaniam KN, Berman CM, De Marco A, Dittmar K, Majolo B, Ogawa H, Thierry B, De Vries H. 2013 Consistency of dominance rank order: A comparison of David's scores with I&SI and Bayesian methods in macaques. *Am. J. Primatol.* **75**, 959–971. (doi:10.1002/ajp.22160)
82. Clutton-Brock T, Sheldon BC. 2010 Individuals and populations: the role of long-term, individual-based studies of animals in ecology and evolutionary biology. *Trends Ecol. Evol.* **25**, 562–573. (doi:10.1016/J.TREE.2010.08.002)
83. Kappeler PM, Watts DP, editors. 2012 *Long-term field studies of primates*. Springer. See [https://books.google.com/books?id=VZS48P\\_Xc\\_8C&dq=Long-term+field+studies+of+primates&lr=&source=gbs\\_navlinks\\_s](https://books.google.com/books?id=VZS48P_Xc_8C&dq=Long-term+field+studies+of+primates&lr=&source=gbs_navlinks_s).
84. Habig B, Archie EA. 2015 Social status, immune response and parasitism in males: a meta-analysis. *Philos. Trans. R. Soc. Lond. B. Biol. Sci.* **370**, 325–383. (doi:10.1098/rstb.2014.0109)
85. Alberts SC, Altmann J. 2012 The Amboseli Baboon Research Project: 40 years of continuity and change. In *Long-Term Field Studies of Primates* (eds P Kappeler, D Watts), pp. 261–287. Berlin: Springer. (doi:10.1007/978-3-642-22514-7\_12)
86. Alberts SC, Altmann J. 2001 Immigration and hybridization patterns of yellow and anubis baboons in and around Amboseli, Kenya. *Am. J. Primatol.* **53**, 139–154. (doi:10.1002/ajp.1)
87. Tung J, Charpentier MJE, Garfield DA, Altmann J, Alberts SC. 2008 Genetic evidence reveals temporal change in hybridization patterns in a wild baboon population. *Mol. Ecol.* **17**, 1998–2011. (doi:10.1111/j.1365-294X.2008.03723.x)
88. Wall JD, Schlebusch SA, Alberts SC, Cox LA, Snyder-Mackler N, Nevonen KA, Carbone L, Tung J. 2016 Genomewide ancestry and divergence patterns from low-coverage sequencing data reveal a complex history of admixture in wild baboons. *Mol. Ecol.* **25**, 3469–3483. (doi:10.1111/mec.13684)
89. Altmann J. 1974 Observational study of behavior: sampling methods. *Behav.* **49** **5**, 636–40. (doi:776901)
90. Hausfater G. 1975 Dominance and reproduction in baboons: a quantitative analysis. *Contrib. to Primatol.* **7**, 145–150.
91. Alberts SC, Watts HE, Altmann J. 2003 Queuing and queue-jumping : long-term patterns of reproductive skew in male savannah baboons , *Papio cynocephalus*. , 821–840. (doi:10.1006/anbe.2003.2106)
92. R Development Core Team. 2018 R: a language and environment for statistical computing. R Foundation for Statistical Computing, Vienna, Austria. URL <https://www.R-project.org/>.
93. Magnusson A, Skaug H, Nielsen A, Berg C, Kristensen K, Maechler M, van Bentham K, Bolker B, Brooks M. 2017 glmmTMB: generalized linear mixed models using a template model builder. *R Packag. version 0.1*
94. Therneau T, Lumley T. 2015 Package 'survival'. *R Top Doc* **128**.
